# Supplementary material for: The Crest Phenotype in Chicken Is Associated with Ectopic Expression of HOXC8 in Cranial Skin
Source: PLoS One. 2012 Apr 13;7(4):e34012. doi: 10.1371/journal.pone.0034012 (PMC3326004; doi:10.1371/journal.pone.0034012)
Supplement: Table S7 — Primers used for RT-PCR and q-PCR. (XLS) [file pone.0034012.s007.xls]

## Sheet: ST 9
which figure the primer was used	Primer name	sequence	Primer name	Sequence	Probe name	Probe sequence
Figure 3A	HOXC8-1F	CATCACACCACGTCCAAGAG	HOXC8-1R	GGGAACATGAGACTGGGAGA
Figure 4	HOXC8-2F	CATCACACCACGTCCAAGAG	HOXC8-2R	ACGCCGCTATTAAAAAGCAA
Figure 3A & 4	GAPDH-1F	CCCCCAATGTCTCTGTTGTT	GAPDH-1R	GGAACAGAACTGGCCTCTCA
Figure 3A	HOXC12-F	TCTGCCGTCCTTATCGTACC	HOXC12-R	TCCGGGATAGTCGTATTTGC
Figure 3A	HOXC13-F	TGCTTCCCATGGAAGGTTAC	HOXC13-R	TGGAACCAGATCGTCACTTG
Figure 5	CTNNB1-F	CCACAAGACTACAAGAAGCGACTTT	CTNNB1-R	TGTCTCGTTCCAAGCCATTG
Figure 5	FGF2-F	GCAGCTTCAAGCAGAAGAAAGAG	FGF2-R	CCATCCTCCTTCATAGCCAGAA
Figure 5	BMP4-F	CCCCAGTTACATGCTGGATCTC	BMP4-R	CGGGTACTGCAGGCTGATCT
Figure 5	TGFB2-F	AGAGCTGAAGGAGAATGGTTGTCT	TGFB2-R	TCCAAGGTTCCTGTCTCTGTGA
Figure 5	FST-F	GCTCTTTAAGTGGATGATTTTTAATGG	FST-R	TCCACAGTCCACATTCTCACATG
Figure 5	GAPDH-2F	CGATCTGAACTACATGGTTTACATGTT	GAPDH-2R	CCCGTTCTCAGCCTTGACA
Figure 5	SHH-F	AGCTGACCCCGTTAGCCTATAA	SHH-R	TGTGATCTTCCCTTCATATCTTCCA
Figure 5	WNT11-F	CAGCTCCTGTTTGAATATCACCAA	WNT11-R	GGATGGTTCACATGCAGACTCA
Figure 5	WNT3A-F	GACTGGTCCCCAAGCAGCTA	WNT3A-R	TCCCAATCTTCACCCCTTCTG
Figure 5	NOG-F	TCGGCAGCCGCTTTTG	NOG-R	CCATGCCTTCTGGGACAGA
Figure 5	BMP7-F	CCAGAGACTGTGCCGAAACC	BMP7-R	TTTTAAGATAACGTTGGAGCTGTCA
Figure 3B&3C	GAPDH-t-F	GGCTGAGAACGGGAAACTTGT	GAPDH-t-R	AACATACTCAGCACCTGCATCTG	GAPDH-t-probe	CCAGGAGCGTGACCCCAGCAA
Figure 3B&3C	HOXC8-t-F	CAAAATTCGTCTCCCAGTCTCAT	HOXC8-t-R	TCTGGTACCGGCTGTAAGTTTGT	HOXC8-t-probe	TGAGACCTCACGCTCCCGGAAGA
Supplementary table S9. Primers used for RT-PCR & q-PCR analysis.
